# Supplementary material for: Heterochromatic foci and transcriptional repression by an unstructured MET-2/SETDB1 co-factor LIN-65
Source: PubMed Central journal article supplement — J Cell Biol. 2019 Mar 4;218(3):820–38. doi: 10.1083/jcb.201811038 (PMC6400574; doi:10.1083/jcb.201811038), 2019-03-04
Supplement: JCB_201811038_sm.pdf [file JCB_201811038_sm.pdf]

## Supplemental material

Delaney et al., <https://doi.org/10.1083/jcb.201811038>

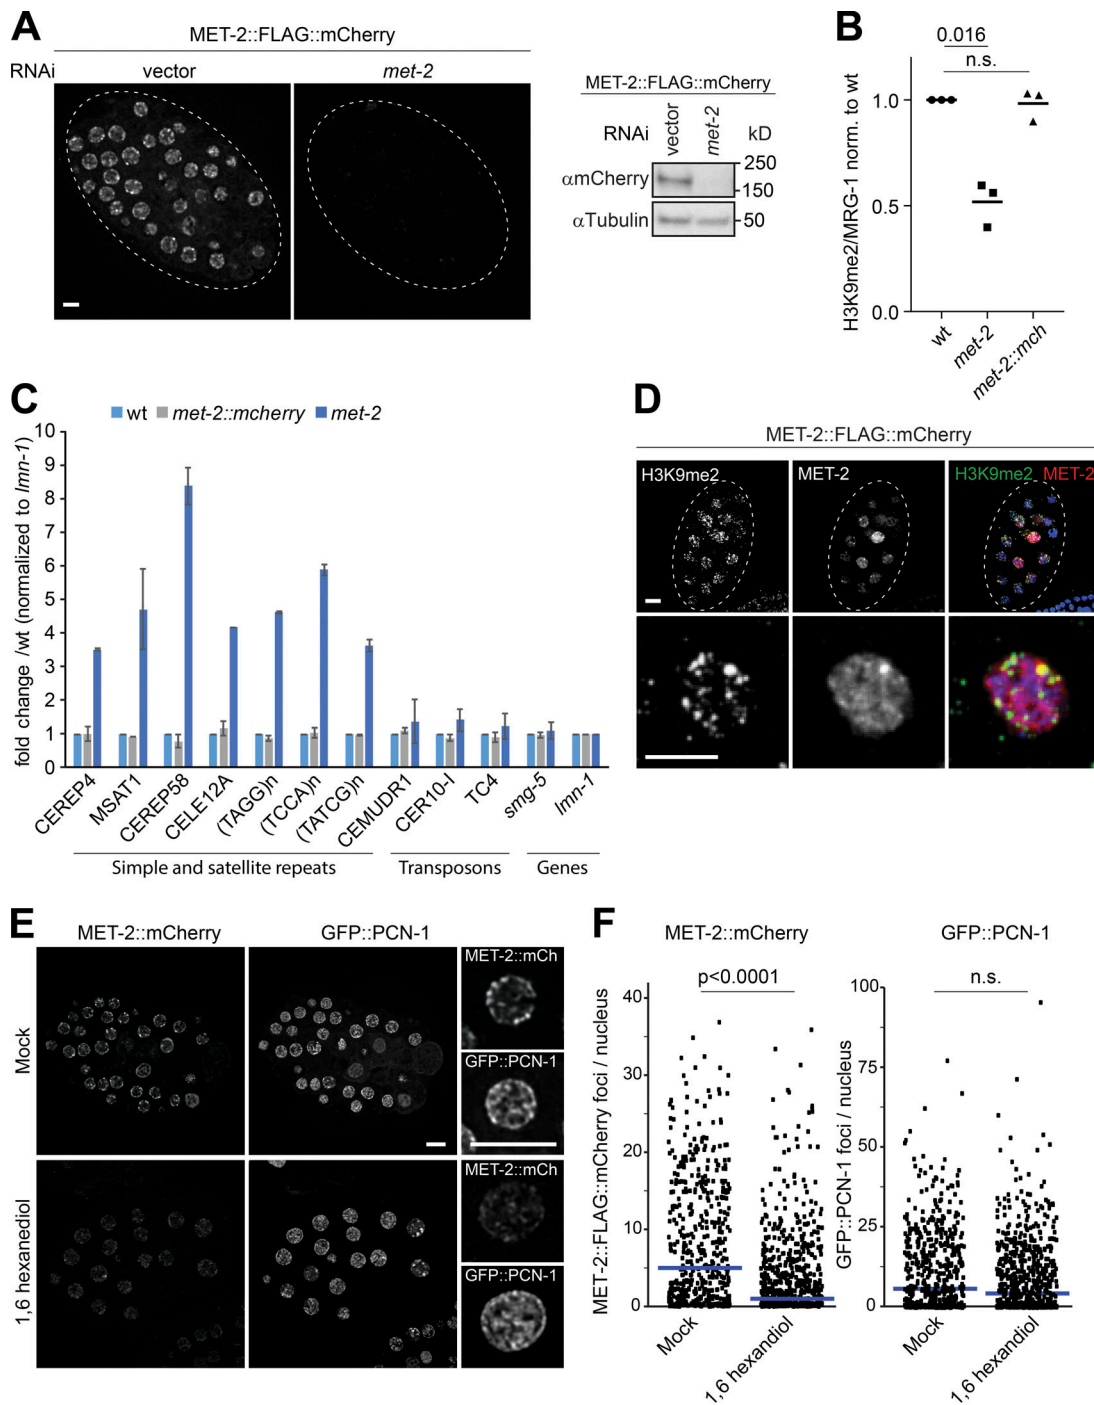

Figure S1. **A fully functional tagged MET-2 protein forms foci that colocalize with repressed H3K9me2 heterochromatin.** (A) Left: Live-cell image of *met-2::FLAG::mcherry(gw1419)* embryos treated with RNAi targeting *met-2* or empty vector control. Scale bars = 5  $\mu$ m. Right: Immunoblotting of MET-2::FLAG::mCherry in embryos treated with *met-2* RNAi or vector control.  $n = 3$ . (B) Quantification of H3K9me2 levels from immunoblots shown in Fig. 1 B. Signals in mutants were normalized to wild-type embryos.  $n = 3$ , P values calculated using two-sided Student t test and indicated above the scatterplots; bars indicate mean signal. (C) RT-PCR for selected repetitive elements showing the fold change in mRNA level in *met-2(n4256)* and *met-2::flag::mcherry(gw1419)* mixed embryos normalized to levels detected in wild-type mixed embryos ( $n = 3$ ; error bars indicate standard deviation). (D) Representative image with IF staining of an early-stage embryo using a specific antibody against H3K9me2 (green; Kimura et al., 2008), and fluorescence signal from mCherry (red) and DAPI in a MET-2::FLAG::mCherry-expressing embryo. Scale bars = 5  $\mu$ m. (E) Representative images of mock (0.1% Triton X-100)-treated and 1,6-hexanediol-treated embryos expressing both MET-2::FLAG::mCherry and GFP::PCN-1.  $n = 3$ , (mock,  $n = 306$ ; 1,6-hexanediol,  $n = 541$ ). (F) Quantification of number of foci in E. Blue bars indicate mean foci number.

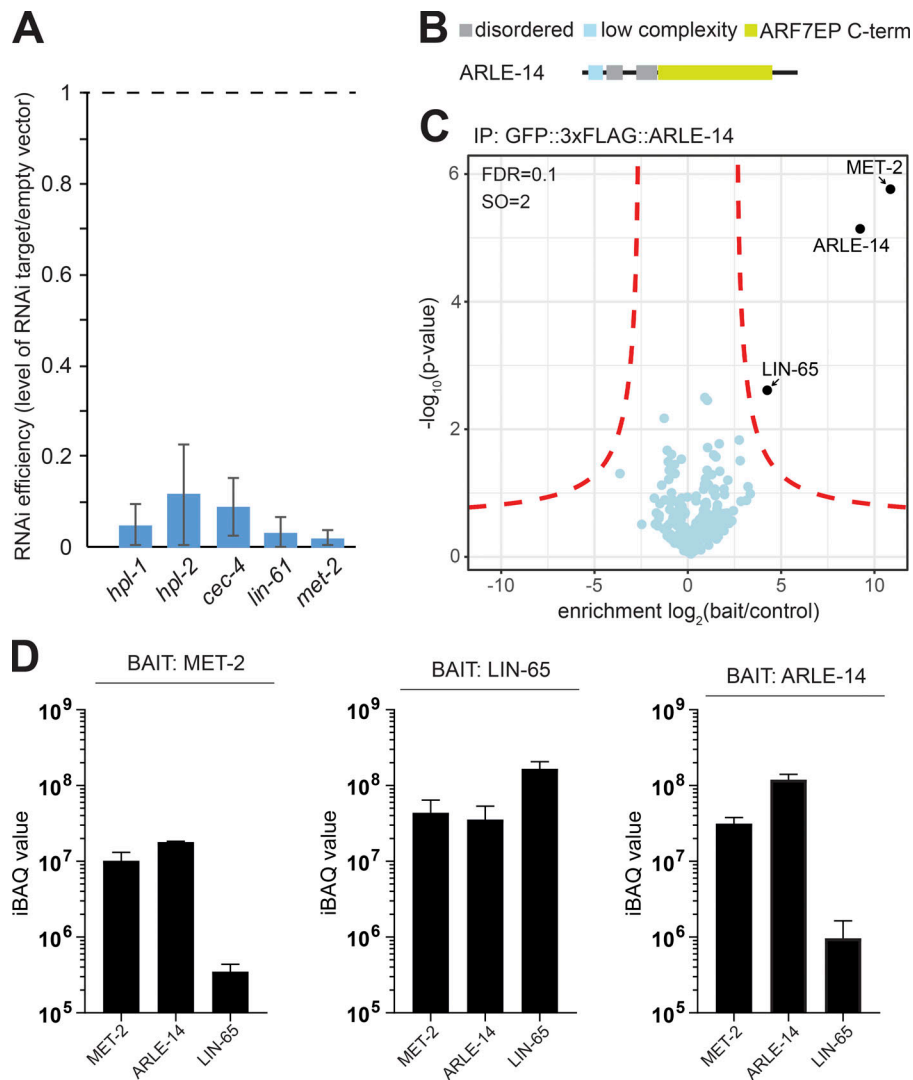

Figure S2. **ARLE-14 and MET-2 interact stoichiometrically while LIN-65 is either less stable or substochiometrically bound.** (A) RT-PCR against the indicated genes targeted by RNAi as shown in Fig. 1 (C-F), normalized to vector control expression level.  $n = 3$ ; error bars indicate standard deviation. (B) Map of domains of the ARLE-14 protein. (C) FLAG-LC-MS/MS of ARLE-14 endogenously tagged with 3xFLAG::GFP. The black circles represent proteins specifically enriched in the pulldown with the tagged strain, and not with the untagged control. Only MET-2, ARLE-14, and LIN-65 are recovered.  $n = 3$  biological replicates. Statistical analysis was done with Perseus (see Materials and methods). (D) iBAQ values for each enriched protein from immunoprecipitation-MS/MS assays. Bait protein is indicated for each panel. Error bars indicate standard deviation.

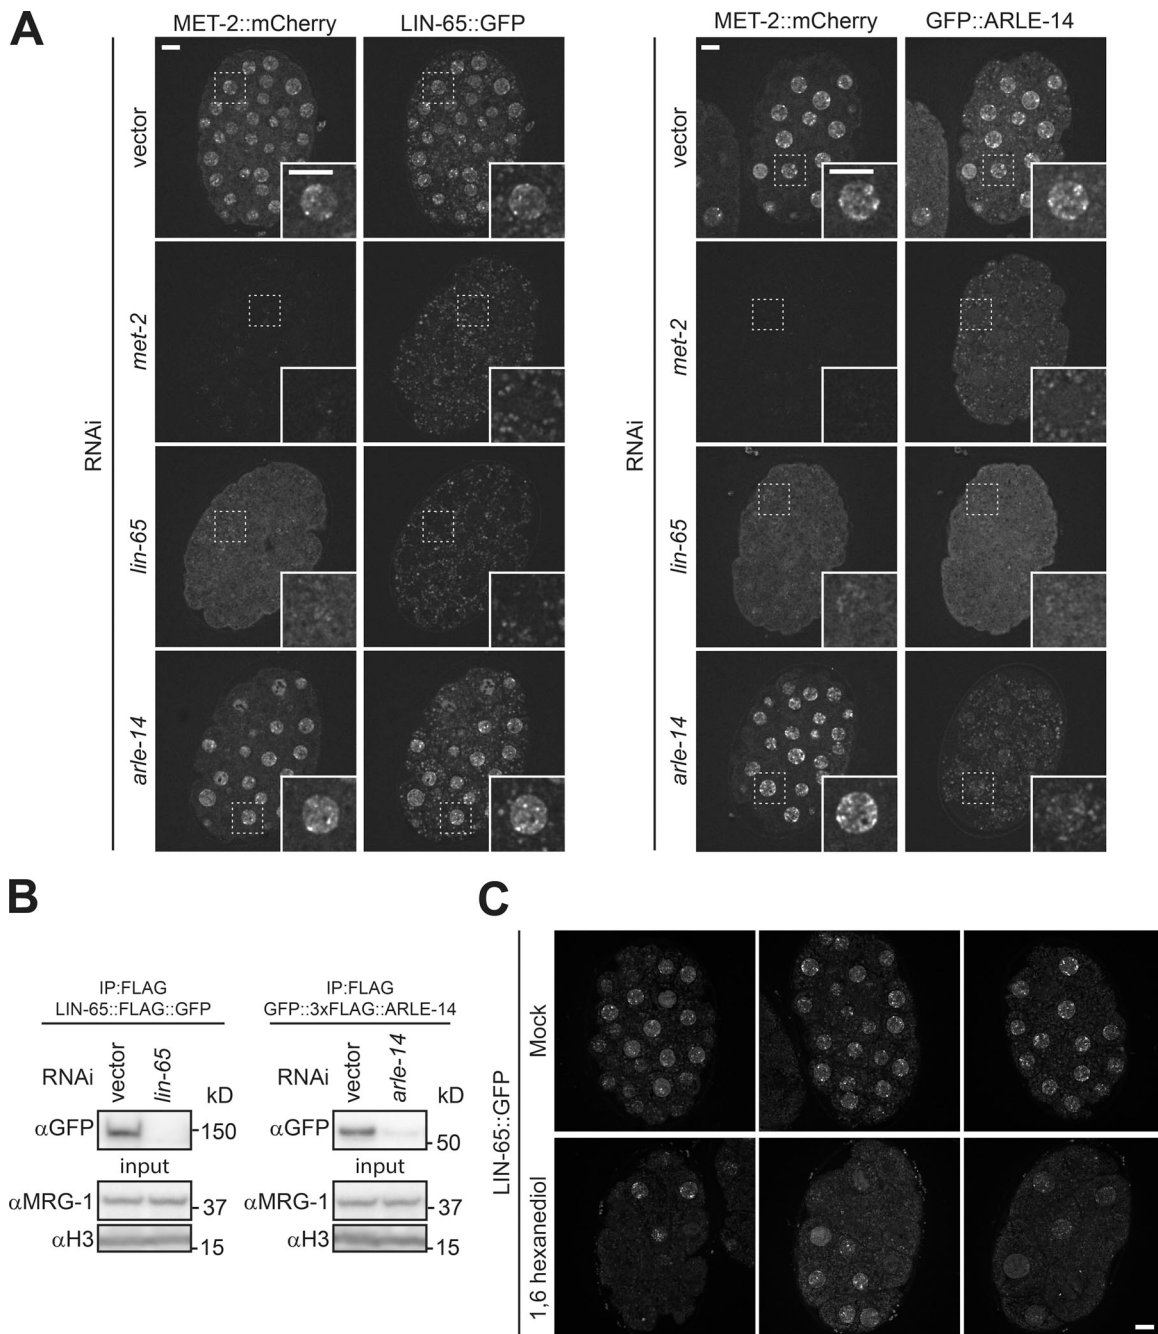

Figure S3. **MET-2 and LIN-65 foci are interdependent and are dispersed by 1,6-hexanediol.** (A) Representative confocal images showing the localization of MET-2::FLAG::mCherry and LIN-65::FLAG::GFP in ~20-cell-stage embryos treated with RNAi against empty vector (vector), *met-2*, *lin-65*, and *arle-14*. Scale bars = 5  $\mu$ m. (B) Localization of MET-2::FLAG::mCherry and GFP::3xFLAG::ARLE-14 in embryos treated with RNAi against empty vector (vector), *met-2*, *lin-65*, and *arle-14*. Scale bars = 5  $\mu$ m. (C) Immunoblotting of FLAG-immunoprecipitated LIN-65::FLAG::GFP and GFP::3xFLAG::ARLE-14 in embryos treated with *lin-65* and *arle-14* RNAi, respectively, or vector control. Equal volumes of input total protein were used to detect MRG-1 and H3. *n* = 3. (D) Three representative images of mock (0.1% Triton X-100)-treated and 1,6-hexanediol-treated embryos expressing LIN-65::FLAG::GFP.

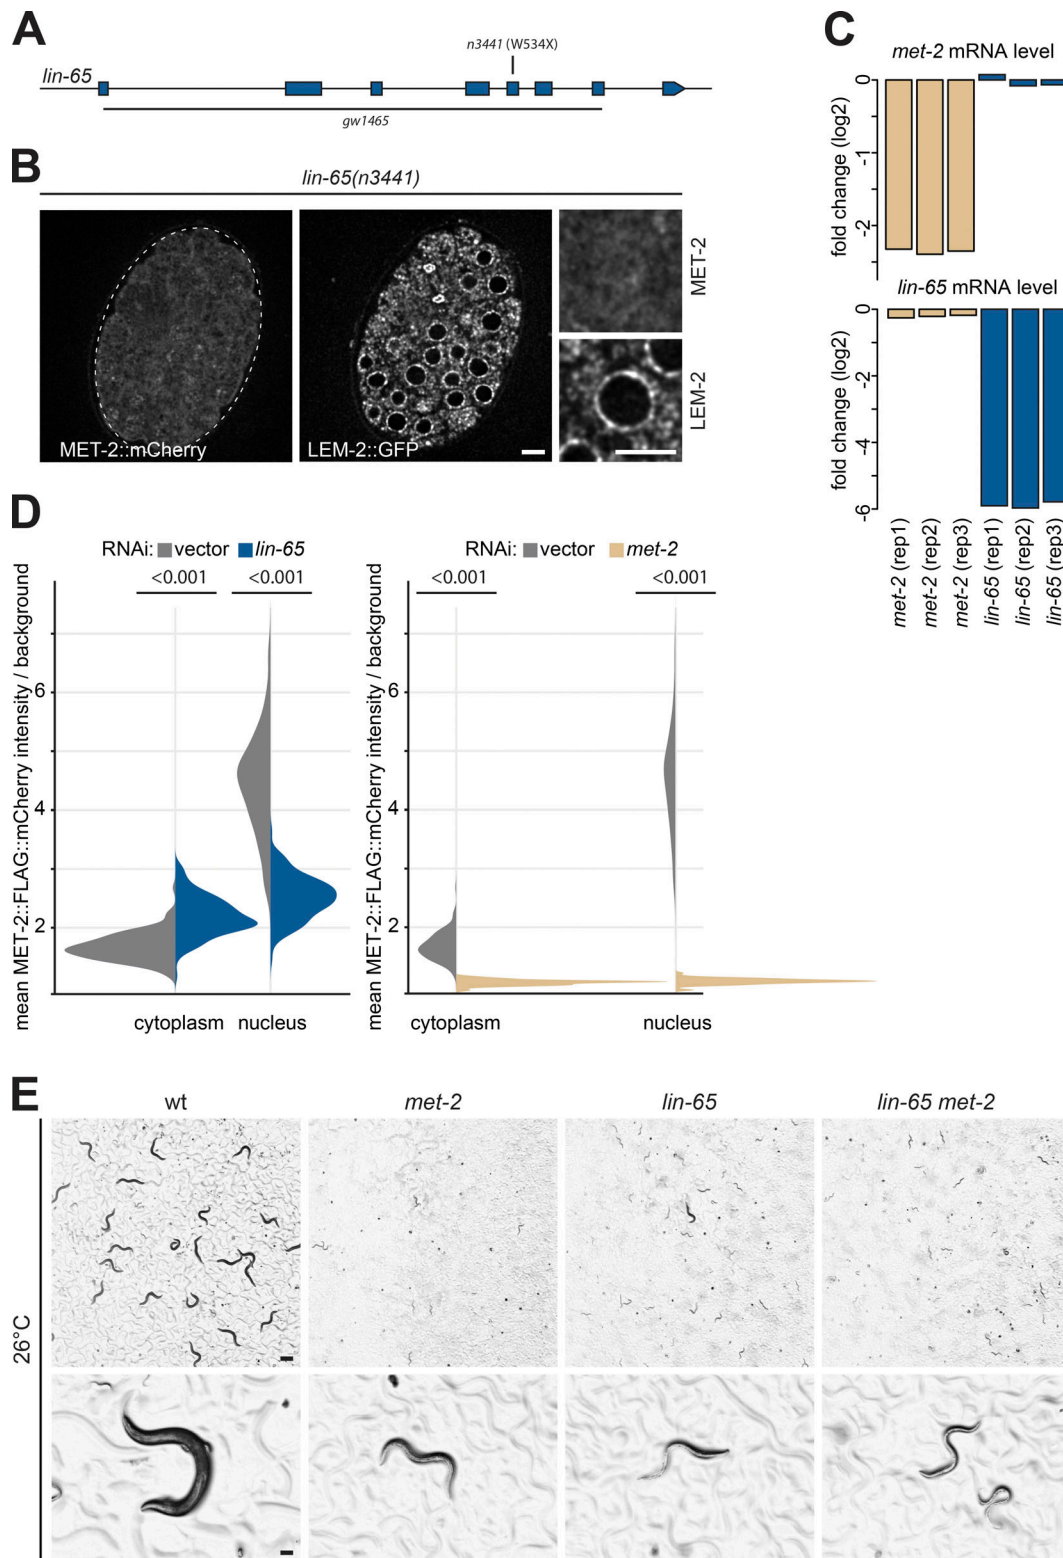

Figure S4. **MET-2 is dispersed between cytoplasm and nucleus in the absence of LIN-65.** (A) Scheme of the *lin-65* gene showing the extent of the deletion in *lin-65(gw1465)* and the point mutant *lin-65(n3441)*. (B) Images of MET-2::FLAG::mCherry in wild-type and *lin-65(n3441)* point mutant embryos. Nuclear periphery is visualized with LEM-2::GFP. Scale bar = 5  $\mu$ m. (C) mRNA levels of *met-2* and *lin-65* in either *met-2(n4256)* or *lin-65(gw1465)* mutants, as determined by RNA-seq, show no alteration in transcriptional levels. (D) Quantification of MET-2::FLAG::mCherry fluorescence intensity in the cytoplasm and the nucleus of embryos treated with RNAi against *lin-65*, *met-2*, or empty vector ( $n = 125$ ; P values were calculated using two-sided Wilcoxon signed-rank test and indicated above violin plots). (E) Overview and magnification of wild-type, *met-2(n4256)*, *lin-65(gw1465)*, and *lin-65;met-2* mutants grown at 26°C, demonstrating germline sterility of the mutants at the elevated temperature (see also Zeller et al., 2016; Padeken et al., 2019). Scale bars = (upper panel) 500  $\mu$ m, (lower panel) 50  $\mu$ m.

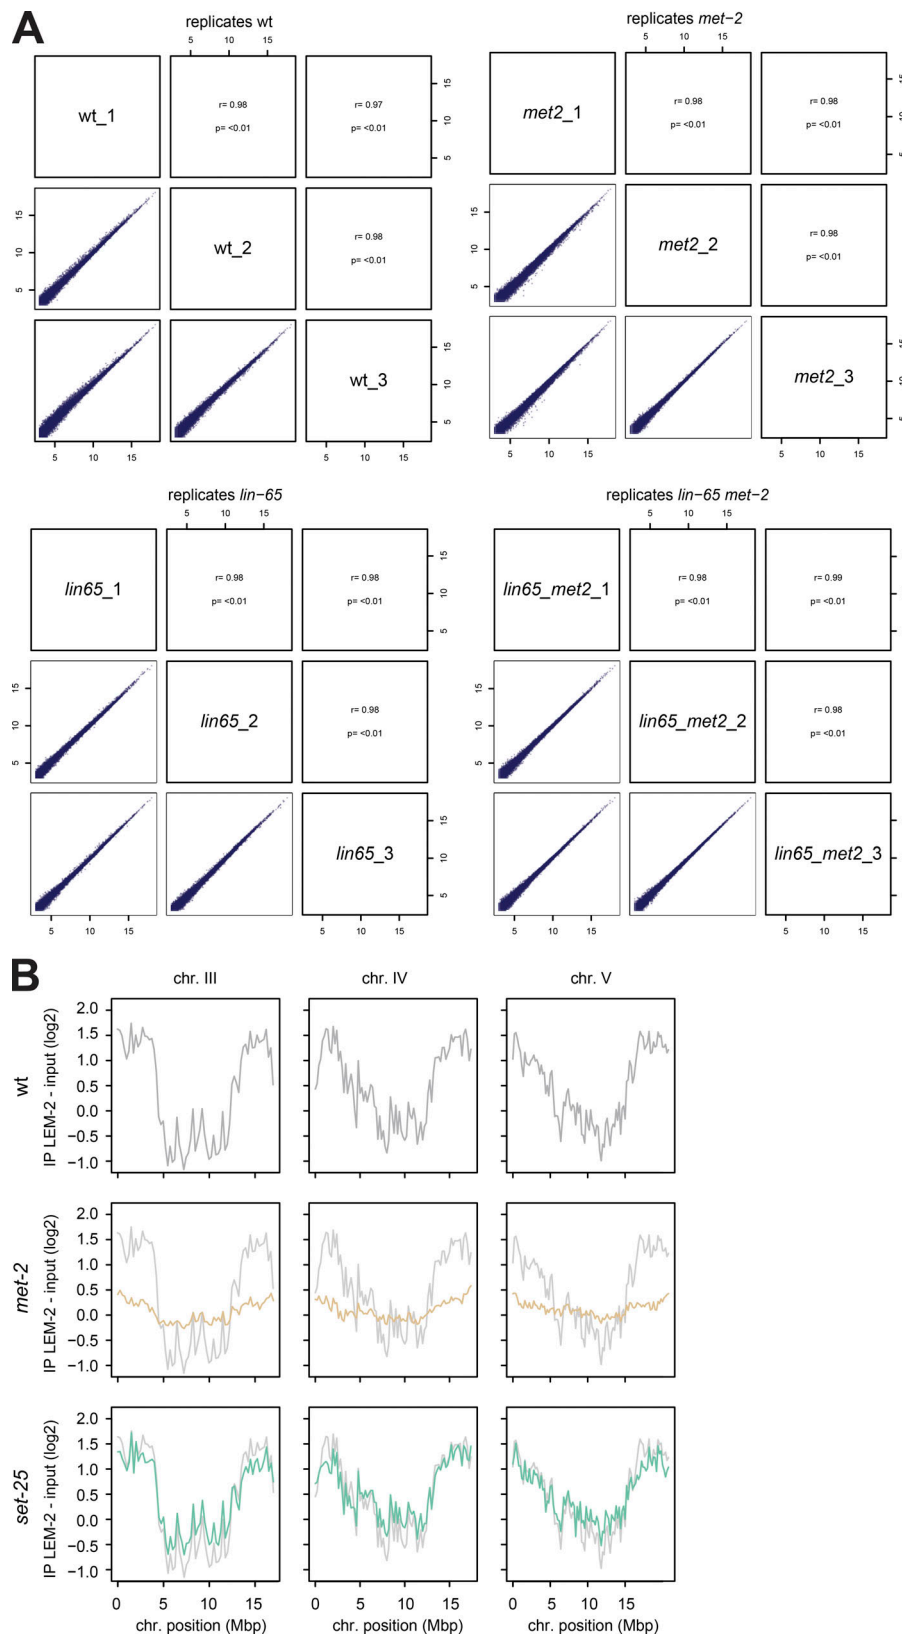

Figure S5. **RNA-seq replicates show strong correlation and perinuclear anchoring is lost in a *met-2* null mutant.** (A) Correlation of the individual replicates from the RNA-seq experiment shown in Fig. 5 for each sequenced genotype. Graphs show the expression of all genes in reads per kilobase per million (RPKM) in log<sub>2</sub> for each replica, and the Spearman correlation coefficient is indicated as *r* to estimate total correlation between replicates. (B) Mapping of LEM-2 association with worm chromosomes III–V in wild-type, *met-2*(*n4256*), and *set-25*(*n5021*) mutant by LEM-2 ChIP-seq, as described in Fig. 6.

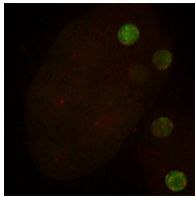

Video 1. Representative video demonstrating the dynamics of MET-2::FLAG::mCherry foci throughout the cell cycle in early embryos. Related to Fig. 1 D. Maximum z-projection, overlay of MET-2 (red) and PCN-1 (green) with 1-min intervals at 5 frames/s.

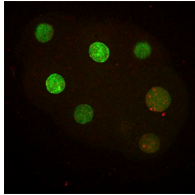

Video 2. Representative video (complementary to Video 1), demonstrating the dynamics of MET-2::FLAG::mCherry foci throughout the cell cycle in early embryos. Related to Fig. 1 D. Maximum z-projection, overlay of MET-2 (red) and PCN-1 (green) with 1-min intervals at 5 frames/s.

Table S1. **Strains used in this study**

| Strain | Genotype                                                                                                      |
|--------|---------------------------------------------------------------------------------------------------------------|
| GW1    | N2 (wild type)                                                                                                |
| GW76   | <i>gwls4[Pmyo-3::RFP; Pbaf-1::GFP::lacI::let-858(3' UTR)] X</i>                                               |
| GW641  | <i>set-25(n5021)</i>                                                                                          |
| GW907  | <i>met-2(n4256)</i>                                                                                           |
| GW1419 | <i>met-2::FLAG::TEV::mCherry(gw1419)</i>                                                                      |
| GW1511 | <i>met-2::FLAG::TEV::mCherry(gw1419); gwls4[Pmyo-3::RFP; Pbaf-1::GFP::lacI::let-858(3' UTR)] X</i>            |
| GW1539 | <i>gwsI34[lem-2p::lem-2::gfp-3X flag::lem-2 3' UTR] II; met-2::FLAG::TEV::mCherry(gw1419)</i>                 |
| GW1562 | <i>lin-65(gw1465)</i>                                                                                         |
| GW1566 | <i>lin-65(gw1465); gwsI34[lem-2p::lem-2::gfp-3X flag::lem-2 3' UTR] II; met-2::FLAG::TEV::mCherry(gw1419)</i> |
| GW1571 | <i>lin-65(gw1465); met-2(n4256)</i>                                                                           |
| GW1573 | <i>lin-65(gw1465); met-2::FLAG::TEV::mCherry(gw1419)</i>                                                      |
| GW1574 | <i>lin-65(n3441)</i>                                                                                          |
| GW1576 | <i>met-2::FLAG::TEV::mCherry; isIs17 [pGZ295 (pie-1p::GFP::pcn-1(W03D2.4)) + pDP#MM051 (unc-119(+))]</i>      |
| GW1580 | <i>lin-65(n3441); met-2::FLAG::TEV::mCherry(gw1419)</i>                                                       |
| GW1581 | <i>lin-65(n3441); gwsI34[lem-2p::lem-2::gfp-3X flag::lem-2 3' UTR] II; met-2::FLAG::TEV::mCherry(gw1419)</i>  |
| GW1618 | <i>lin-65::FLAG::TEV::GFP(gw1578)</i>                                                                         |
| GW1621 | <i>lin-65::FLAG::TEV::GFP(gw1578); met-2::FLAG::TEV::mCherry(gw1419)</i>                                      |
| GW1623 | <i>GFP::TEV::3xFLAG::arle-14(gw1623); met-2::FLAG::TEV::mCherry(gw1419)</i>                                   |
| GW1639 | <i>arle-14(tm6748)</i>                                                                                        |

Table S2. **gRNA sequences**

| Target             | Guide sequence (5' to 3') |
|--------------------|---------------------------|
| met-2 C terminus   | TAAC TTTTCAGCAAACGGC      |
| lin-65 C terminus  | CATTCGAGAGTGATGAAGG       |
| lin-65 5' end      | ATCTGATCATCATTTAATGG      |
| lin-65 3' end      | CGAATTACGATTGTGGCTG       |
| arle-14 N terminus | ATTGTGCGGAGAACGTCAT       |

## References

- Kimura, H., Y. Hayashi-Takanaka, Y. Goto, N. Takizawa, and N. Nozaki. 2008. The organization of histone H3 modifications as revealed by a panel of specific monoclonal antibodies. *Cell Struct. Funct.* 33:61-73. <https://doi.org/10.1247/csf.07035>
- Padeken, J., P. Zeller, B. Towbin, I. Katic, V. Kalck, S. Methot, and S.M. Gasser. 2019. Synergistic lethality between BRCA1 and H3K9me2 loss reflects satellite derepression. *Genes Dev.* In press.
- Zeller, P., J. Padeken, R. van Schendel, V. Kalck, M. Tijsterman, and S.M. Gasser. 2016. Histone H3K9 methylation is dispensable for *Caenorhabditis elegans* development but suppresses RNA:DNA hybrid-associated repeat instability. *Nat. Genet.* 48:1385-1395. <https://doi.org/10.1038/ng.3672>
